# Supplementary material for: Experimental evaluation of cryopreservative solutions to maintain in vitro and in vivo infectivity of P. berghei sporozoites
Source: PLoS One. 2017 May 22;12(5):e0177304. doi: 10.1371/journal.pone.0177304 (PMC5439657; doi:10.1371/journal.pone.0177304)
Supplement: S1 Appendix — The Excel file with the raw data collected and the initial data analysis. (XLSX) [file pone.0177304.s001.xlsx]

## Sheet: TABLE 2
P. berghei ANKA GFP spz after cryopreservation and infection in HC-04
Raw data
Cryopreservation manual
All 7 Cryogenic solutions
		Storage in				Infection					Flow Reading						Analyzed data
File name	File name	LNVP			Post thaw	96 well			SPZ				Percent	Relative
Infection	Infection	(days)	Sporozoites	Sporozoites/	Recovery	plate		Spz	HCO4	96well	Total	Total	HC04	sporozoite			Set 1
Expt	Date		day	mosquito	(%)	HCO4/well	SPZ/well	Fresh/cryo	Incubation	plate	Infected	All	Infectivity	infectivity			Table 2
5	Control	21	18	3174		80000	40000	FRESH	3 hrs	A07	3636	78494	4.6322						Average	Average	SD	SD	p-value	p-value
2014-01-19						80000	40000	FRESH	3 hrs	B07	3328	61326	5.42674				Cryogenic	Thaw	Percent	Relative	Percent	Relative	Percent	Relative
Manual						80000	40000	FRESH	3 hrs	C07	3254	64034	5.08168				Solution	Method	HC04	sporozoite	HC04	sporozoite	HC04	sporozoite
RPMIspz:CS2 1:3						80000	40000	FRESH	3 hrs	D07	2644	84028	3.14657	4.5718					Infectivity	infectivity	Infectivity	infectivity	Infectivity	infectivity
	2014-02-10				100	80000	40000	Cryo	3 hrs	A06	920	64872	1.41818	31.0201					Infectivity	Viability	SD	SD	p-value	p-value
	Thaw at RT					80000	40000	Cryo	3 hrs	B06	668	33658	1.98467	43.4112			CS2	Control	5.10684	.	0.882793	.	.	.
						80000	40000	Cryo	3 hrs	C06	724	44998	1.60896	35.1932				RT	2.00247	37.8585	0.479242	5.60343	.	.
						80000	40000	Cryo	3 hrs	D06	460	30152	1.5256	33.3699				37C	1.68729	31.479	0.238492	3.76888	0.17	0.02
		Storage in				Infection					Flow Reading						DX5	Control	7.44671	.	0.387144	.	.	.
File name	File name	LNVP			Post thaw	96 well			SPZ				Percent	Relative				RT	0.123726	1.66216	0.0378177	0.512257	.	.
Infection	Infection	(days)	Sporozoites	Sporozoites/	Recovery	plate		Spz	HCO4	96well	Total	Total	HC04	sporozoite				37C	0.100053	1.34712	0.0500894	0.681045	0.21	0.21
Expt	Date		day	mosquito	(%)	HCO4/well	SPZ/well	Fresh/cryo	Incubation	plate	Infected	All	Infectivity	infectivity			MC	Control	7.54915	.	3.10608	.	.	.
6	Control	20	18	4431		80000	40000	FRESH	3 hrs	E07	2708	55570	4.87313					RT	0.437511	6.18096	0.110031	1.16606	.	.
2014-01-20						80000	40000	FRESH	3 hrs	F07	2912	64690	4.50147					37C	0.331288	4.41569	0.143631	0.637475	0.17	0.005
Manual						80000	40000	FRESH	3 hrs	G07	3758	71460	5.25889				Hestar 200	Control	5.61658	.	0.228694	.	.	.
RPMIspz:CS2 1:3						80000	40000	FRESH	3 hrs	H07	2934	63276	4.63683	4.81758				RT	0.275659	4.90795	0.103591	1.84439	.	.
	2014-02-10				100.592	80000	40000	Cryo	3 hrs	G05	836	50684	1.64944	34.2379				37C	0.470926	8.38457	0.132227	2.35422	0.009	0.009
	Thaw at 37C					80000	40000	Cryo	3 hrs	G06	688	50350	1.36643	28.3635			Voluven	Control	7.13636	.	0.863062	.	.	.
						80000	40000	Cryo	3 hrs	H05	578	31828	1.81601	37.6955				RT	0.0407081	0.559907	0.0272957	0.36161	.	.
						80000	40000	Cryo	3 hrs	H06	694	49920	1.39022	28.8573				37C	0.0586145	0.817459	0.0167933	0.21339	0.17	0.12
		Storage in				Infection					Flow Reading						Hetastarch	Control	7.13134	.	1.72403	.	.	.
File name	File name	LNVP			Post thaw	96 well			SPZ				Percent	Relative				RT	0.505871	6.90175	0.191897	1.23456	.	.
Infection	Infection	(days)	Sporozoites	Sporozoites/	Recovery	plate		Spz	HCO4	96well	Total	Total	HC04	sporozoite				37C	0.918713	12.292	0.43287	3.38339	0.09	0.002
Expt	Date		day	mosquito	(%)	HCO4/well	SPZ/well	Fresh/cryo	Incubation	plate	Infected	All	Infectivity	infectivity			Glycerolyte 57	Control	5.11326	.	0.49249	.	.	.
64	Control	4	18	18888		80000	40000	FRESH	3 hrs	A04	9036	149268	6.05354					RT	0.333434	6.5969	0.103569	2.27578	.	.
2015-03-06						80000	40000	FRESH	3 hrs	B04	7598	115406	6.58371					37C	0.249407	4.92938	0.0763861	1.65076	0.21	0.21
Manual						80000	40000	FRESH	3 hrs	C04	8916	150706	5.91615
RPMIspz:CS2 1:3						80000	40000	FRESH	3 hrs	D04	7480	144648	5.17117	5.93115
	2015-03-10				95.1634	80000	40000	Cryo	3 hrs	A05	2080	73846	2.81667	47.4895
	Thaw at RT					80000	40000	Cryo	3 hrs	B05	1526	70300	2.1707	36.5983
						80000	40000	Cryo	3 hrs	C05	1476	60546	2.43782	41.1019
						80000	40000	Cryo	3 hrs	D05	1218	59208	2.05715	34.6839
	2015-03-10				96.732	80000	40000	Cryo	3 hrs	E05	1376	71510	1.92421	32.4424
	Thaw at 37C					80000	40000	Cryo	3 hrs	F05	990	60872	1.62636	27.4207
						80000	40000	Cryo	3 hrs	G05	1686	82384	2.04651	34.5045
						80000	40000	Cryo	3 hrs	H05	1414	84212	1.6791	28.3098
		Storage in				Infection					Flow Reading
File name	File name	LNVP			Post thaw	96 well			SPZ				Percent	Relative
Infection	Infection	(days)	Sporozoites	Sporozoites/	Recovery	plate		Spz	HCO4	96well	Total	Total	HC04	sporozoite
Expt	Date		day	mosquito	(%)	HCO4/well	SPZ/well	Fresh/cryo	Incubation	plate	Infected	All	Infectivity	infectivity
33	Control	7	19	22435		80000	40000	FRESH	3 hrs	E07	4660	60452	7.7086
2014-09-10						80000	40000	FRESH	3 hrs	F07	3990	53956	7.39491
Manual						80000	40000	FRESH	3 hrs	G07	4268	57620	7.40715
RPMIspz:DX5 1:3						80000	40000	FRESH	3 hrs	H07	3896	51918	7.50414	7.5037
	2014-09-17				63.4921	80000	40000	Cryo	3 hrs	A03	40	48114	0.0831359	1.10793
	Thaw at RT					80000	40000	Cryo	3 hrs	B03	40	28264	0.141523	1.88604
						80000	40000	Cryo	3 hrs	C03	42	38078	0.1103	1.46994
						80000	40000	Cryo	3 hrs	D03	50	36306	0.137718	1.83534
	2014-09-17				60.9524	80000	40000	Cryo	3 hrs	E03	38	43902	0.0865564	1.15352
	Thaw at 37C					80000	40000	Cryo	3 hrs	F03	16	36118	0.0442992	0.590365
						80000	40000	Cryo	3 hrs	G03	36	34690	0.103776	1.383
						80000	40000	Cryo	3 hrs	H03	10	31800	0.0314465	0.41908
		Storage in				Infection					Flow Reading
File name	File name	LNVP			Post thaw	96 well			SPZ				Percent	Relative
Infection	Infection	(days)	Sporozoites	Sporozoites/	Recovery	plate		Spz	HCO4	96well	Total	Total	HC04	sporozoite
Expt	Date		day	mosquito	(%)	HCO4/well	SPZ/well	Fresh/cryo	Incubation	plate	Infected	All	Infectivity	infectivity
39	Control	8	19	17129		80000	40000	FRESH	3 hrs	E07	3984	51916	7.67393
2014-10-01						80000	40000	FRESH	3 hrs	F07	3504	43564	8.04334
Manual						80000	40000	FRESH	3 hrs	G07	3998	57122	6.99905
RPMIspz:DX5 1:3						80000	40000	FRESH	3 hrs	H07	2926	42762	6.84252	7.38971
	2014-10-09				70.5055	80000	40000	Cryo	3 hrs	A01	70	39838	0.175712	2.37779
	Thaw at RT					80000	40000	Cryo	3 hrs	B01	60	42152	0.142342	1.92622
						80000	40000	Cryo	3 hrs	C01	60	42528	0.141084	1.90919
						80000	40000	Cryo	3 hrs	D01	28	48280	0.057995	0.784808
	2014-10-09				56.4044	80000	40000	Cryo	3 hrs	E01	62	32170	0.192726	2.60803
	Thaw at 37C					80000	40000	Cryo	3 hrs	F01	40	39502	0.101261	1.37029
						80000	40000	Cryo	3 hrs	G01	56	43452	0.128878	1.74402
						80000	40000	Cryo	3 hrs	H01	56	50232	0.111483	1.50862
		Storage in				Infection					Flow Reading
File name	File name	LNVP			Post thaw	96 well			SPZ				Percent	Relative
Infection	Infection	(days)	Sporozoites	Sporozoites/	Recovery	plate		Spz	HCO4	96well	Total	Total	HC04	sporozoite
Expt	Date		day	mosquito	(%)	HCO4/well	SPZ/well	Fresh/cryo	Incubation	plate	Infected	All	Infectivity	infectivity
31	Control	3	21	15000		80000	40000	FRESH	3 hrs	A12	3858	73618	5.24057
2014-08-29						80000	40000	FRESH	3 hrs	B12	4104	91522	4.48417
Manual						80000	40000	FRESH	3 hrs	C12	4614	98438	4.68721
RPMIspz:MC 1:3						80000	40000	FRESH	3 hrs	D12	3956	91486	4.32416	4.68403
	2014-09-01				97.7778	80000	40000	Cryo	3 hrs	A02	128	39512	0.323952	6.91611
	Thaw at RT					80000	40000	Cryo	3 hrs	B02	98	31306	0.313039	6.68312
						80000	40000	Cryo	3 hrs	C02	144	38084	0.378112	8.07236
						80000	40000	Cryo	3 hrs	D02	120	36008	0.333259	7.1148
	2014-09-01				93.3333	80000	40000	Cryo	3 hrs	E02	88	37630	0.233856	4.99263
	Thaw at 37C					80000	40000	Cryo	3 hrs	F02	64	32126	0.199216	4.25308
						80000	40000	Cryo	3 hrs	G02	80	40458	0.197736	4.22149
						80000	40000	Cryo	3 hrs	H02	72	34288	0.209986	4.48302
		Storage in				Infection					Flow Reading
File name	File name	LNVP			Post thaw	96 well			SPZ				Percent	Relative
Infection	Infection	(days)	Sporozoites	Sporozoites/	Recovery	plate		Spz	HCO4	96well	Total	Total	HC04	sporozoite
Expt	Date		day	mosquito	(%)	HCO4/well	SPZ/well	Fresh/cryo	Incubation	plate	Infected	All	Infectivity	infectivity
32	Control	2	21	17777		80000	40000	FRESH	3 hrs	A07	5884	62458	9.42073
2014-09-09						80000	40000	FRESH	3 hrs	B07	4464	42228	10.5712
Manual						80000	40000	FRESH	3 hrs	C07	5246	48896	10.7289
RPMIspz:MC 1:3						80000	40000	FRESH	3 hrs	D07	4546	41568	10.9363	10.4143
	2014-09-11				81.25	80000	40000	Cryo	3 hrs	A08	250	44604	0.560488	5.38192
	Thaw at RT					80000	40000	Cryo	3 hrs	B08	214	39008	0.548605	5.26782
						80000	40000	Cryo	3 hrs	C08	248	48982	0.506308	4.86168
						80000	40000	Cryo	3 hrs	D08	216	40274	0.536326	5.14991
	2014-09-11				78.125	80000	40000	Cryo	3 hrs	E08	186	40688	0.457137	4.38952
	Thaw at 37C					80000	40000	Cryo	3 hrs	F08	212	36846	0.575368	5.5248
						80000	40000	Cryo	3 hrs	G08	150	42856	0.350009	3.36086
						80000	40000	Cryo	3 hrs	H08	184	43092	0.426993	4.10008
		Storage in				Infection					Flow Reading
File name	File name	LNVP			Post thaw	96 well			SPZ				Percent	Relative
Infection	Infection	(days)	Sporozoites	Sporozoites/	Recovery	plate		Spz	HCO4	96well	Total	Total	HC04	sporozoite
Expt	Date		day	mosquito	(%)	HCO4/well	SPZ/well	Fresh/cryo	Incubation	plate	Infected	All	Infectivity	infectivity
14	Control	6	18	19285		80000	40000	FRESH	3 hrs	E08	4660	86566	5.38318
2014-03-11						80000	40000	FRESH	3 hrs	F08	5346	97820	5.46514
Manual						80000	40000	FRESH	3 hrs	G08	5104	87082	5.86114
RPMIspz:Hestar200 1:3						80000	40000	FRESH	3 hrs	H08	4388	76222	5.75687	5.61658
	2014-03-17				93.75	80000	40000	Cryo	3 hrs	A06	148	39060	0.378904	6.74617
	Thaw at RT					80000	40000	Cryo	3 hrs	B06	136	40726	0.333939	5.94559
						80000	40000	Cryo	3 hrs	C06	194	47824	0.405654	7.22244
						80000	40000	Cryo	3 hrs	D06	124	36804	0.33692	5.99866
	3/17/14				97.2222	80000	40000	Cryo	3 hrs	E06	214	43340	0.49377	8.79129
	Thaw at 37C					80000	40000	Cryo	3 hrs	F06	192	38468	0.499116	8.88648
						80000	40000	Cryo	3 hrs	G06	232	35670	0.650407	11.5801
						80000	40000	Cryo	3 hrs	H06	182	28590	0.636586	11.3341
	3/17/14				92.562	80000	40000	Cryo	3 hrs	A11	178	89074	0.199834	3.55793
	Thaw at RT					80000	40000	Cryo	3 hrs	B11	86	58082	0.148067	2.63624
						80000	40000	Cryo	3 hrs	C11	140	53622	0.261087	4.6485
						80000	40000	Cryo	3 hrs	D11	92	65310	0.140867	2.50805
	3/17/14				97.8512	80000	40000	Cryo	3 hrs	E11	154	60032	0.25653	4.56737
	Thaw at 37C					80000	40000	Cryo	3 hrs	F11	228	63334	0.359996	6.40953
						80000	40000	Cryo	3 hrs	G11	326	78046	0.417702	7.43695
						80000	40000	Cryo	3 hrs	H11	278	61328	0.4533	8.07075
		Storage in				Infection					Flow Reading
File name	File name	LNVP			Post thaw	96 well			SPZ				Percent	Relative
Infection	Infection	(days)	Sporozoites	Sporozoites/	Recovery	plate		Spz	HCO4	96well	Total	Total	HC04	sporozoite
Expt	Date		day	mosquito	(%)	HCO4/well	SPZ/well	Fresh/cryo	Incubation	plate	Infected	All	Infectivity	infectivity
29	Control	2	19	11538		80000	40000	FRESH	3 hrs	A11	5286	64788	8.15892
2014-08-05						80000	40000	FRESH	3 hrs	B11	3810	50966	7.47557
Manual						80000	40000	FRESH	3 hrs	C11	3512	59936	5.85958
RPMIspz:Voluven 1:3						80000	40000	FRESH	3 hrs	D11	3296	54588	6.03796	6.88301
	2014-08-07				83.8951	80000	40000	Cryo	3 hrs	A08	16	75494	0.0211937	0.307914
	Thaw at RT					80000	40000	Cryo	3 hrs	B08	10	94730	0.0105563	0.153368
						80000	40000	Cryo	3 hrs	C08	18	69856	0.0257673	0.374361
						80000	40000	Cryo	3 hrs	D08	18	119930	0.0150088	0.218055
	2014-08-07				71.9101	80000	40000	Cryo	3 hrs	E08	42	78302	0.0536385	0.779288
	Thaw at 37C					80000	40000	Cryo	3 hrs	F08	24	58632	0.0409333	0.5947
						80000	40000	Cryo	3 hrs	G08	42	95136	0.0441473	0.641396
						80000	40000	Cryo	3 hrs	H08	60	106818	0.0561703	0.816072
		Storage in				Infection					Flow Reading
File name	File name	LNVP			Post thaw	96 well			SPZ				Percent	Relative
Infection	Infection	(days)	Sporozoites	Sporozoites/	Recovery	plate		Spz	HCO4	96well	Total	Total	HC04	sporozoite
Expt	Date		day	mosquito	(%)	HCO4/well	SPZ/well	Fresh/cryo	Incubation	plate	Infected	All	Infectivity	infectivity
39	Control	8	19	17129		80000	40000	FRESH	3 hrs	E07	3984	51916	7.67393
2014-10-01						80000	40000	FRESH	3 hrs	F07	3504	43564	8.04334
Manual						80000	40000	FRESH	3 hrs	G07	3998	57122	6.99905
RPMIspz:Voluven 1:3						80000	40000	FRESH	3 hrs	H07	2926	42762	6.84252	7.38971
	2014-10-09				84.6065	80000	40000	Cryo	3 hrs	A02	38	57766	0.0657826	0.890192
	Thaw at RT					80000	40000	Cryo	3 hrs	B02	26	57982	0.0448415	0.60681
						80000	40000	Cryo	3 hrs	C02	48	54840	0.0875274	1.18445
						80000	40000	Cryo	3 hrs	D02	30	54558	0.0549874	0.744107
	2014-10-09				91.6571	80000	40000	Cryo	3 hrs	E02	32	51236	0.0624561	0.845176
	Thaw at 37C					80000	40000	Cryo	3 hrs	F02	48	50788	0.0945105	1.27895
						80000	40000	Cryo	3 hrs	G02	40	60408	0.0662164	0.896062
						80000	40000	Cryo	3 hrs	H02	32	62938	0.0508437	0.688033
		Storage in				Infection					Flow Reading
File name	File name	LNVP			Post thaw	96 well			SPZ				Percent	Relative
Infection	Infection	(days)	Sporozoites	Sporozoites/	Recovery	plate		Spz	HCO4	96well	Total	Total	HC04	sporozoite
Expt	Date		day	mosquito	(%)	HCO4/well	SPZ/well	Fresh/cryo	Incubation	plate	Infected	All	Infectivity	infectivity
13	Control	8	18	4341		80000	40000	FRESH	3 hrs	A08	3728	41020	9.08825
2014-03-10						80000	40000	FRESH	3 hrs	B08	4512	51888	8.69565
Manual						80000	40000	FRESH	3 hrs	C08	4410	46946	9.39377
RPMIspz:Hetastarch 1:3						80000	40000	FRESH	3 hrs	D08	4130	55760	7.40674	8.6461
	2014-03-18				90	80000	40000	Cryo	3 hrs	A07	312	50168	0.62191	7.19296
	Thaw at RT					80000	40000	Cryo	3 hrs	B07	170	28680	0.592748	6.85566
						80000	40000	Cryo	3 hrs	C07	146	21688	0.673183	7.78597
						80000	40000	Cryo	3 hrs	C07	176	21688	0.811509	9.38583
	2014-03-18				100	80000	40000	Cryo	3 hrs	D07	392	33022	1.18709	13.7297
	Thaw at 37C					80000	40000	Cryo	3 hrs	E07	316	19686	1.6052	18.5656
						80000	40000	Cryo	3 hrs	F07	384	32388	1.18562	13.7128
						80000	40000	Cryo	3 hrs	F07	400	32388	1.23503	14.2842
		Storage in				Infection					Flow Reading
File name	File name	LNVP			Post thaw	96 well			SPZ				Percent	Relative
Infection	Infection	(days)	Sporozoites	Sporozoites/	Recovery	plate		Spz	HCO4	96well	Total	Total	HC04	sporozoite
Expt	Date		day	mosquito	(%)	HCO4/well	SPZ/well	Fresh/cryo	Incubation	plate	Infected	All	Infectivity	infectivity
14	Control	3	18	19285		80000	40000	FRESH	3 hrs	E08	4660	86566	5.38318
2014-03-11						80000	40000	FRESH	3 hrs	F08	5346	97820	5.46514
Manual						80000	40000	FRESH	3 hrs	G08	5104	87082	5.86114
RPMIspz:Hetastarch 1:3						80000	40000	FRESH	3 hrs	H08	4388	76222	5.75687	5.61658
	2014-03-14				72.9167	80000	40000	Cryo	3 hrs	A03	204	61834	0.329916	5.87396
	Thaw at RT					80000	40000	Cryo	3 hrs	B03	172	54886	0.313377	5.57949
						80000	40000	Cryo	3 hrs	C03	240	69432	0.345662	6.15431
						80000	40000	Cryo	3 hrs	D03	308	85874	0.358665	6.38582
	2014-03-14				79.8611	80000	40000	Cryo	3 hrs	E03	224	45404	0.493349	8.78379
	Thaw at 37C					80000	40000	Cryo	3 hrs	F03	250	45750	0.546448	9.72919
						80000	40000	Cryo	3 hrs	G03	332	65446	0.507288	9.03198
						80000	40000	Cryo	3 hrs	H03	240	40700	0.589681	10.4989
		Storage in				Infection					Flow Reading
File name	File name	LNVP			Post thaw	96 well			SPZ				Percent	Relative
Infection	Infection	(days)	Sporozoites	Sporozoites/	Recovery	plate		Spz	HCO4	96well	Total	Total	HC04	sporozoite
Expt	Date		day	mosquito	(%)	HCO4/well	SPZ/well	Fresh/cryo	Incubation	plate	Infected	All	Infectivity	infectivity
19	Control	11	22	22368		80000	40000	FRESH	3 hrs	A05	4710	98946	4.76017
2014-03-17						80000	40000	FRESH	3 hrs	B05	4942	87574	5.64323
Manual						80000	40000	FRESH	3 hrs	C05	5996	125824	4.76539
RPMIspz:Glycerolyte57 1:3						80000	40000	FRESH	3 hrs	D05	4436	98618	4.49816	4.91674
	2014-03-28				87.5676	80000	40000	Cryo	3 hrs	A04	258	71678	0.359943	7.32077
	Thaw at RT					80000	40000	Cryo	3 hrs	B04	302	63882	0.472747	9.61505
						80000	40000	Cryo	3 hrs	C04	284	64770	0.438475	8.918
						80000	40000	Cryo	3 hrs	D04	310	74736	0.414793	8.43635
	2014-03-28				86.4865	80000	40000	Cryo	3 hrs	E04	160	52536	0.304553	6.19421
	Thaw at 37C					80000	40000	Cryo	3 hrs	F04	90	29746	0.302562	6.15371
						80000	40000	Cryo	3 hrs	G04	198	61208	0.323487	6.5793
						80000	40000	Cryo	3 hrs	H04	168	55340	0.303578	6.17438
		Storage in				Infection					Flow Reading
File name	File name	LNVP			Post thaw	96 well			SPZ				Percent	Relative
Infection	Infection	(days)	Sporozoites	Sporozoites/	Recovery	plate		Spz	HCO4	96well	Total	Total	HC04	sporozoite
Expt	Date		day	mosquito	(%)	HCO4/well	SPZ/well	Fresh/cryo	Incubation	plate	Infected	All	Infectivity	infectivity
35	Control	1	19	12254		80000	40000	FRESH	3 hrs	E01	4090	75346	5.42829
2014-09-16						80000	40000	FRESH	3 hrs	F01	3768	63726	5.91281
Manual						80000	40000	FRESH	3 hrs	G01	3732	75182	4.96395
RPMIspz:Glycerolyte57 1:3						80000	40000	FRESH	3 hrs	H01	3278	66436	4.93407	5.30978
	2014-09-17				80.9195	80000	40000	Cryo	3 hrs	E07	194	76526	0.253509	4.77437
	Thaw at RT					80000	40000	Cryo	3 hrs	F07	192	65180	0.294569	5.54766
						80000	40000	Cryo	3 hrs	G07	188	75284	0.249721	4.70304
						80000	40000	Cryo	3 hrs	H07	136	74028	0.183714	3.45992
	2014-09-17				73.5632	80000	40000	Cryo	3 hrs	A08	182	67372	0.270142	5.08763
	Thaw at 37C					80000	40000	Cryo	3 hrs	B08	106	62060	0.170802	3.21675
						80000	40000	Cryo	3 hrs	C08	84	72764	0.115442	2.17413
						80000	40000	Cryo	3 hrs	D08	128	62534	0.204689	3.85493

## Sheet: Fig 1A
P. berghei ANKA GFP spz after cryopreservation and infection in HC-04
Raw data															Analyzed data
Pb GFP spz dilution and infection in HC-04
		Storage in			Infection					Flow Reading			Average
	File name	LNVP			96 well			SPZ				Percent	Percent
Spz dilution	Infection	(days)	Sporozoites	Sporozoites/	plate		Spz	HC-04	96well	Total	Total	HC-04	HC-04
Expt	Date		day	mosquito	HC-04/well	SPZ/well	Fresh/cryo	Incubation	plate	Infected	All	Infectivity	Infectivity
1	2014-08-19	0	23	13888	80000	10000	FRESH	3 hrs	A04	1990	92318	2.15559
					80000	10000	FRESH	3 hrs	B04	1434	76714	1.86928
					80000	10000	FRESH	3 hrs	C04	1950	93402	2.08775
					80000	10000	FRESH	3 hrs	D04	1502	80220	1.87235	1.99624
					80000	20000	FRESH	3 hrs	A05	3360	83870	4.0062
					80000	20000	FRESH	3 hrs	B05	2528	75804	3.33492
					80000	20000	FRESH	3 hrs	C05	2850	69136	4.12231
					80000	20000	FRESH	3 hrs	D05	2620	68928	3.80107	3.81612
					80000	40000	FRESH	3 hrs	A06	5476	101270	5.40733
					80000	40000	FRESH	3 hrs	B06	3776	62418	6.04954
					80000	40000	FRESH	3 hrs	C06	4346	69674	6.23762
					80000	40000	FRESH	3 hrs	D06	5144	93306	5.51304	5.80188
					80000	80000	FRESH	3 hrs	A07	9528	102490	9.29652
					80000	80000	FRESH	3 hrs	B07	7480	82108	9.10995
					80000	80000	FRESH	3 hrs	C07	8556	94808	9.02455
					80000	80000	FRESH	3 hrs	D07	6010	64310	9.34536	9.1941
		Storage in			Infection					Flow Reading			Average
	File name	LNVP			96 well			SPZ				Percent	Percent
Spz dilution	Infection	(days)	Sporozoites	Sporozoites/	plate		Spz	HC-04	96well	Total	Total	HC-04	HC-04
Expt	Date		day	mosquito	HC-04/well	SPZ/well	Fresh/cryo	Incubation	plate	Infected	All	Infectivity	Infectivity
79	2015-07-06	0	21	15000	80000	10000	FRESH	3 hrs	A07	1722	70896	2.42891
					80000	10000	FRESH	3 hrs	B07	1266	70284	1.80126
					80000	10000	FRESH	3 hrs	C07	1686	95859	1.75883
					80000	10000	FRESH	3 hrs	D07	1659	94041	1.76412	1.93828
					80000	20000	FRESH	3 hrs	E07	3864	102456	3.77138
					80000	20000	FRESH	3 hrs	F07	3024	80784	3.74332
					80000	20000	FRESH	3 hrs	G07	3681	87756	4.19458
					80000	20000	FRESH	3 hrs	H07	3057	75498	4.04911	3.9396
					80000	40000	FRESH	3 hrs	A08	4440	61029	7.27523
					80000	40000	FRESH	3 hrs	B08	3117	46083	6.76388
					80000	40000	FRESH	3 hrs	C08	5718	80394	7.11247
					80000	40000	FRESH	3 hrs	D08	5598	80310	6.97049	7.03052
					80000	80000	FRESH	3 hrs	E08	11409	90303	12.6341
					80000	80000	FRESH	3 hrs	F08	7962	58482	13.6144
					80000	80000	FRESH	3 hrs	G08	10866	81864	13.2732
					80000	80000	FRESH	3 hrs	H08	8469	77979	10.8606	12.5956
Pool expt 1 and 2, 8 replicated (same as data used for stat calculation)																										Figure 1A
		Storage in			Infection					Flow Reading			Average							Pooled data		Average
	File name	LNVP			96 well			SPZ				Percent	Percent							from 2 expt.		Percent
Spz dilution	Infection	(days)	Sporozoites	Sporozoites/	plate		Spz	HC-04	96well	Total	Total	HC-04	HC-04								Spz/well	HC-04
Expt	Date		day	mosquito	HC-04/well	SPZ/well	Fresh/cryo	Incubation	plate	Infected	All	Infectivity	Infectivity								(x10,000)	Infectivity	SD
1	2014-08-19	0	23	13888	80000	10000	FRESH	3 hrs	A04	1990	92318	2.15559									1	1.96726	0.237239
					80000	10000	FRESH	3 hrs	B04	1434	76714	1.86928									2	3.87786	0.276714
					80000	10000	FRESH	3 hrs	C04	1950	93402	2.08775									4	6.4162	0.722169
					80000	10000	FRESH	3 hrs	D04	1502	80220	1.87235									8	10.8949	1.98993
79	2015-07-06	0	21	15000	80000	10000	FRESH	3 hrs	A07	1722	70896	2.42891
					80000	10000	FRESH	3 hrs	B07	1266	70284	1.80126
					80000	10000	FRESH	3 hrs	C07	1686	95859	1.75883
					80000	10000	FRESH	3 hrs	D07	1659	94041	1.76412	1.96726
					80000	20000	FRESH	3 hrs	A05	3360	83870	4.0062
					80000	20000	FRESH	3 hrs	B05	2528	75804	3.33492
					80000	20000	FRESH	3 hrs	C05	2850	69136	4.12231
					80000	20000	FRESH	3 hrs	D05	2620	68928	3.80107
					80000	20000	FRESH	3 hrs	E07	3864	102456	3.77138
					80000	20000	FRESH	3 hrs	F07	3024	80784	3.74332
					80000	20000	FRESH	3 hrs	G07	3681	87756	4.19458
					80000	20000	FRESH	3 hrs	H07	3057	75498	4.04911	3.87786
					80000	40000	FRESH	3 hrs	A06	5476	101270	5.40733
					80000	40000	FRESH	3 hrs	B06	3776	62418	6.04954
					80000	40000	FRESH	3 hrs	C06	4346	69674	6.23762
					80000	40000	FRESH	3 hrs	D06	5144	93306	5.51304
					80000	40000	FRESH	3 hrs	A08	4440	61029	7.27523
					80000	40000	FRESH	3 hrs	B08	3117	46083	6.76388
					80000	40000	FRESH	3 hrs	C08	5718	80394	7.11247
					80000	40000	FRESH	3 hrs	D08	5598	80310	6.97049	6.4162
					80000	80000	FRESH	3 hrs	A07	9528	102490	9.29652
					80000	80000	FRESH	3 hrs	B07	7480	82108	9.10995
					80000	80000	FRESH	3 hrs	C07	8556	94808	9.02455
					80000	80000	FRESH	3 hrs	D07	6010	64310	9.34536
					80000	80000	FRESH	3 hrs	E08	11409	90303	12.6341
					80000	80000	FRESH	3 hrs	F08	7962	58482	13.6144
					80000	80000	FRESH	3 hrs	G08	10866	81864	13.2732
					80000	80000	FRESH	3 hrs	H08	8469	77979	10.8606	10.8949

## Sheet: Fig 1B
P. berghei ANKA GFP spz after cryopreservation and infection in HC-04
Raw data															Analyzed data
Infection incubation time points
															Set 1	Expt 1	Expt 2				Figure 1B
		Storage in			Infection					Flow Reading			Average			Average	Average	Average				Average
	File name	LNVP			96 well			SPZ				HC-04	Percent		Infection	Percent	Percent	Percent			Infection	Percent
Time points	Infection	(days)	Sporozoites	Sporozoites/	plate		Spz	HC-04	96well	Total	Total	Percent	HC-04		Incubation	HC-04	HC-04	HC-04			Incubation	HC-04
Expt	Date		day	mosquito	HC-04/well	SPZ/well	Fresh/cryo	Incubation	plate	Infected	All	Infectivity	Infectivity		(hrs)	Infectivity	Infectivity	Infectivity	SD		(hrs)	Infectivity	SD
2	2014-08-29	0	21	15000	80000	40000	FRESH	30min	A09	1892	58936	3.21026			0.5	2.73646	3.06553	2.90099	0.232693		0.5	2.90099	0.232693
					80000	40000	FRESH	30min	B09	1628	62718	2.59575			1	3.42034	4.03089	3.72561	0.431724		1	3.72561	0.431724
					80000	40000	FRESH	30min	C09	2042	76332	2.67516			2	4.75029	5.71319	5.23174	0.680876		2	5.23174	0.680876
					80000	40000	FRESH	30min	D09	1604	65080	2.46466	2.73646		3	5.50838	6.25861	5.88349	0.530494		3	5.88349	0.530494
					80000	40000	FRESH	1 hrs	E09	2908	87376	3.32815			4	5.51565	6.57608	6.04587	0.74984		4	6.04587	0.74984
					80000	40000	FRESH	1 hrs	F09	2196	66594	3.29759			5	5.53977	6.34004	5.9399	0.565883		5	5.9399	0.565883
					80000	40000	FRESH	1 hrs	G09	2228	60862	3.66074
					80000	40000	FRESH	1 hrs	H09	2214	65216	3.39487	3.42034
					80000	40000	FRESH	2 hrs	A10	3850	73350	5.24881
					80000	40000	FRESH	2 hrs	B10	3308	67798	4.8792
					80000	40000	FRESH	2 hrs	C10	4736	102440	4.62319
					80000	40000	FRESH	2 hrs	D10	3968	93366	4.24994	4.75029
					80000	40000	FRESH	3 hrs	E10	4346	76086	5.71196
					80000	40000	FRESH	3 hrs	F10	4592	82228	5.58447
					80000	40000	FRESH	3 hrs	G10	4638	84152	5.51146
					80000	40000	FRESH	3 hrs	H10	4280	81904	5.22563	5.50838
					80000	40000	FRESH	4 hrs	A11	4816	96200	5.00624
					80000	40000	FRESH	4 hrs	B11	4074	83714	4.86657
					80000	40000	FRESH	4 hrs	C11	4524	69356	6.52287
					80000	40000	FRESH	4 hrs	D11	4280	75526	5.66692	5.51565
					80000	40000	FRESH	5 hrs	E11	3844	63900	6.01565
					80000	40000	FRESH	5 hrs	F11	3644	66512	5.47871
					80000	40000	FRESH	5 hrs	G11	4218	78890	5.34669
					80000	40000	FRESH	5 hrs	H11	2694	50658	5.31801	5.53977
		Storage in			Infection					Flow Reading			Average
	File name	LNVP			96 well			SPZ				HC-04	Percent
Time points	Infection	(days)	Sporozoites	Sporozoites/	plate		Spz	HCO4	96well	Total	Total	Percent	HC-04
Expt	Date		day	mosquito	HC-04/well	SPZ/well	Fresh/cryo	Incubation	plate	Infected	All	Infectivity	Infectivity
3	2014-09-02	0	21	9473	80000	40000	FRESH	30min	A03	1640	46588	3.52022
					80000	40000	FRESH	30min	B03	1220	44728	2.7276
					80000	40000	FRESH	30min	C03	1414	52308	2.70322
					80000	40000	FRESH	30min	D03	1876	56658	3.31109	3.06553
					80000	40000	FRESH	1 hrs	E03	2068	59598	3.46992
					80000	40000	FRESH	1 hrs	F03	2042	42862	4.76413
					80000	40000	FRESH	1 hrs	G03	2098	63884	3.28408
					80000	40000	FRESH	1 hrs	H03	2108	45772	4.60544	4.03089
					80000	40000	FRESH	2 hrs	A04	2344	58684	3.99427
					80000	40000	FRESH	2 hrs	B04	3916	56122	6.97766
					80000	40000	FRESH	2 hrs	C04	2910	63252	4.60065
					80000	40000	FRESH	2 hrs	D04	3976	54614	7.28018	5.71319
					80000	40000	FRESH	3 hrs	E04	4100	76364	5.36902
					80000	40000	FRESH	3 hrs	F04	4518	67978	6.64627
					80000	40000	FRESH	3 hrs	G04	4302	74380	5.78381
					80000	40000	FRESH	3 hrs	H04	3934	54372	7.23534	6.25861
					80000	40000	FRESH	4 hrs	A05	4158	66632	6.24024
					80000	40000	FRESH	4 hrs	B05	4330	63808	6.78598
					80000	40000	FRESH	4 hrs	C05	4046	70958	5.70196
					80000	40000	FRESH	4 hrs	D05	4194	55358	7.57614	6.57608
					80000	40000	FRESH	5 hrs	E05	2164	52786	4.09957
					80000	40000	FRESH	5 hrs	F05	3662	48356	7.573
					80000	40000	FRESH	5 hrs	G05	2580	43928	5.87325
					80000	40000	FRESH	5 hrs	H05	3812	48782	7.81436	6.34004

## Sheet: Fig 3
P. berghei ANKA GFP spz after cryopreservation and infection in HC-04
Raw data																			Analyzed data
Sporozoites/vial test			Cryopreservation manual
(Millions)																			Set 1
		Storage in				Infection					Flow Reading									Expt 1	Expt 2					Sporozoites viability (% control)
	File name	LNVP			Post thaw	96 well			SPZ				Percent	Average or	Average					Average	Average	Average				Average
	Infection	(days)	Sporozoites	Sporozoites/	Recovery	plate		Spz	HCO4	96well	Total	Total	HCO4	Percent	Percent				Spz/vial	Percent	Percent	Percent				Percent
Expt	Date		day	mosquito	(%)	HCO4/well	SPZ/well	Fresh/cryo	Incubation	plate	Infected	All	Infectivity	Viability	Viability				(millions)	Viability	Viability	Viability	SD			Viability
106	Control	4	20	40000		80000	40000	FRESH	3 hrs	E06	4521	95154	4.75125						Control	100	100	100	0			Cryopreserved
RPMIspz:CS2 1:3	2015-09-21					80000	40000	FRESH	3 hrs	F06	3633	76206	4.76734						0.25	44.3577	38.6569	41.5073	6.77692			Sporozoites	SD
Manual						80000	40000	FRESH	3 hrs	G06	4695	81495	5.76109						0.5	44.2712	36.7924	40.5318	7.03471		Control	100	0
						80000	40000	FRESH	3 hrs	H06	5544	110154	5.03295	5.07816	Control				1	45.2945	41.3661	43.3303	7.18937		0.25	41.5073	6.77692
Spz/vial 0.25 M	2015-11-25				100	80000	40000	Cryo	3 hrs	A04	1098	52600	2.08745	41.1065											0.5	40.5318	7.03471
	Thaw at RT					80000	40000	Cryo	3 hrs	B04	1288	51010	2.525	49.7227											1	43.3303	7.18937
						80000	40000	Cryo	3 hrs	C04	1024	45036	2.27374	44.7748
						80000	40000	Cryo	3 hrs	D04	1174	55272	2.12404	41.827	44.3577				Control			#DIV/0!
Spz/vial 0.5 M	2015-11-25				100	80000	40000	Cryo	3 hrs	E04	1174	63548	1.84742	36.3798					0.25	6.77692		#DIV/0!
	Thaw at RT					80000	40000	Cryo	3 hrs	F04	988	37686	2.62166	51.6263					0.5	7.03471		#DIV/0!
						80000	40000	Cryo	3 hrs	G04	1452	62846	2.31041	45.497					1	7.18937		#DIV/0!
						80000	40000	Cryo	3 hrs	H04	1020	46088	2.21316	43.5819	44.2712
Spz/vial 1.0 M	2015-11-25				100	80000	40000	Cryo	3 hrs	A05	1238	52738	2.34745	46.2265
	Thaw at RT					80000	40000	Cryo	3 hrs	B05	1102	50690	2.174	42.8108
						80000	40000	Cryo	3 hrs	C05	1860	78586	2.36683	46.6081
						80000	40000	Cryo	3 hrs	D05	1094	47314	2.31221	45.5325	45.2945
																			Set 2	Expt 1	Expt 2
		Storage in				Infection					Flow Reading									Average	Average	Average
	File name	LNVP			Post thaw	96 well			SPZ				Percent	Average or	Average					Percent	Percent	Percent
	Infection	(days)	Sporozoites	Sporozoites/	Recovery	plate		Spz	HCO4	96well	Total	Total	HCO4	Percent	Percent				Spz/vial	HC-04	HC-04	HC-04
Expt	Date		day	mosquito	(%)	HCO4/well	SPZ/well	Fresh/cryo	Incubation	plate	Infected	All	Infectivity	Viability	Viability				(millions)	Infectivity	Infectivity	Infectivity	SD
109	Control	3	20	35087		80000	40000	FRESH	3 hrs	A12	7485	130524	5.73458						Control	11.4956	19.1738	5.30593	0.543768
RPMIspz:CS2 1:3	2015-09-23					80000	40000	FRESH	3 hrs	B12	6795	132360	5.13373						0.25	2.865	2.0325	2.19585	0.335713
Manual						80000	40000	FRESH	3 hrs	C12	9162	146574	6.25077						0.5	2.89625	2.195	2.14207	0.327555
						80000	40000	FRESH	3 hrs	D12	7236	144267	5.0157	5.53369	Control				1	3.30875	2.34	2.2946	0.379735
Spz/vial 0.25 M	2015-11-25				100	80000	40000	Cryo	3 hrs	A10	878	50474	1.73951	31.4349
	Thaw at RT					80000	40000	Cryo	3 hrs	B10	802	28554	2.80871	50.7566
						80000	40000	Cryo	3 hrs	C10	914	45326	2.0165	36.4405
						80000	40000	Cryo	3 hrs	D10	658	33034	1.99189	35.9956	38.6569
Spz/vial 0.5 M	2015-11-25				96	80000	40000	Cryo	3 hrs	E10	854	55730	1.53239	27.692
	Thaw at RT					80000	40000	Cryo	3 hrs	F10	922	40452	2.27924	41.1885
						80000	40000	Cryo	3 hrs	G10	896	40112	2.23375	40.3663
						80000	40000	Cryo	3 hrs	H10	840	40028	2.09853	37.9228	36.7924
Spz/vial 1.0 M	2015-11-25				100	80000	40000	Cryo	3 hrs	A11	1116	54224	2.05813	37.1927
	Thaw at RT					80000	40000	Cryo	3 hrs	B11	910	29190	3.11751	56.3368						Sporozoite Viability	HC-04 Infectivity
						80000	40000	Cryo	3 hrs	C11	880	40458	2.1751	39.3064					0.25	41.5073	2.44875	15.3347
						80000	40000	Cryo	3 hrs	D11	838	46412	1.80557	32.6286	41.3661				0.5	40.5318	2.54563	15.3347
																			1	43.3303	2.82437	15.3347
																				Sporozoite Viability	HC-04 Infectivity
																			0.25	39.0586	2.19585	15.3347
																			0.5	37.9862	2.14207	15.3347
																			1	40.5059	2.2946	15.3347
																				SD	SD
																				0	0.543768
																				4.03112	0.335713
																				5.28835	0.327555
																				2.77776	0.379735

## Sheet: Fig4A
P. berghei ANKA GFP spz after cryopreservation and infection in HC-04
Raw data																			Analyzed data		Statistical Results:	Hep_infect/fresh (normal) and no diff
RPMIspz:CS2 ratio	1:3, 1:1, 3:1																					Hep_infect/cryo (non-normal) and diff (A=control, B=1:3, 1:1, C=3:1)
Cryopreservation manual
		Storage in				Infection					Flow Reading
	File name	LNVP			Post thaw	96 well			SPZ				Percent	Average or	Average
	Infection	(days)	Sporozoites	Sporozoites/	Recovery	plate		Spz	HC-04	96well	Total	Total	HC-04	Percent	Percent
Expt	Date		day	mosquito	(%)	HC-04/well	SPZ/well	Fresh/cryo	Incubation	plate	Infected	All	Infectivity	Viability	Viability				Set 2		Figure 4A		Expt 1	Expt 2
135	Control	3	21	41666		80000	40000	FRESH	3 hrs	A11	2128	29194	7.28917										Average	Average	Average
RPMIspz:CS2 ratio	2015-12-07					80000	40000	FRESH	3 hrs	B11	2182	15626	13.9639										Percent	Percent	Percent
Manual						80000	40000	FRESH	3 hrs	C11	3362	28596	11.7569										Hepatocyte	Hepatocyte	Hepatocyte
						80000	40000	FRESH	3 hrs	D11	2922	20372	14.3432	11.8383	Control					RPMIspz(ul)	CS2(ul)	Ratio	Infectivity	Infectivity	Infectivity	SD
RPMIspz:CS2 1:3	2015-12-07					80000	40000	FRESH	3 hrs	E11	2350	24448	9.61224	81.1961					Control	100	0	1	11.8383	11.5515	11.6949	0.202808
						80000	40000	FRESH	3 hrs	F11	2050	13796	14.8594	125.52					Fresh	25	75	1:3	11.2994	11.487	11.3932	0.132683
						80000	40000	FRESH	3 hrs	G11	2160	27118	7.96519	67.2832						50	50	1:1	11.6578	11.3838	11.5208	0.193762
						80000	40000	FRESH	3 hrs	H11	1652	12946	12.7607	107.792	95.4477					75	25	3:1	11.4482	11.101	11.2746	0.245487
RPMIspz:CS2 1:1	2015-12-07					80000	40000	FRESH	3 hrs	A12	2400	22896	10.4822	88.5447					CS2	25	75	1:3	4.31833	4.82265	4.57049	0.356608
						80000	40000	FRESH	3 hrs	B12	2166	15078	14.3653	121.346						50	50	1:1	3.5308	4.27088	3.90084	0.523313
						80000	40000	FRESH	3 hrs	C12	2776	28034	9.90226	83.646						75	25	3:1	0.891389	0.694349	0.792869	0.139329
						80000	40000	FRESH	3 hrs	D12	2382	20048	11.8815	100.365	98.4754
RPMIspz:CS2 3:1	2015-12-07					80000	40000	FRESH	3 hrs	E12	2554	26326	9.70144	81.9496
						80000	40000	FRESH	3 hrs	F12	1864	18486	10.0833	85.1753									Fresh	Cryopreserved
						80000	40000	FRESH	3 hrs	G12	3130	34820	8.98909	75.9323									Sporozoites	Sporozoites
						80000	40000	FRESH	3 hrs	H12	2158	12680	17.0189	143.762	96.7047							Control	11.6949
RPMIspz:CS2 1:3	2015-12-10				100	80000	40000	Cryo	3 hrs	A01	1188	32740	3.62859	30.6513								1:3	11.3932	4.57049
	Thaw at RT					80000	40000	Cryo	3 hrs	B01	1336	19520	6.84426	57.8146								1:1	11.5208	3.90084
						80000	40000	Cryo	3 hrs	C01	1398	41308	3.38433	28.588								3:1	11.2746	0.792869
						80000	40000	Cryo	3 hrs	D01	1012	29624	3.41615	28.8568	36.4777								SD	SD
RPMIspz:CS2 1:1	2015-12-10				96.66	80000	40000	Cryo	3 hrs	E01	1376	35138	3.91599	33.079								Control	3.30313
	Thaw at RT					80000	40000	Cryo	3 hrs	F01	1192	30834	3.86586	32.6556								1:3	2.05275	1.62789
						80000	40000	Cryo	3 hrs	G01	1358	45780	2.96636	25.0573								1:1	2.13884	0.604493
						80000	40000	Cryo	3 hrs	H01	1188	35200	3.375	28.5092	29.8253							3:1	1.38583	0.163267
RPMIspz:CS2 3:1	2015-12-10				93.33	80000	40000	Cryo	3 hrs	A02	376	47852	0.785756	6.63741
	Thaw at RT					80000	40000	Cryo	3 hrs	B02	388	37076	1.0465	8.83995
						80000	40000	Cryo	3 hrs	C02	322	39734	0.810389	6.84549
						80000	40000	Cryo	3 hrs	D02	346	37490	0.922913	7.79599	7.52971
		Storage in				Infection					Flow Reading
	File name	LNVP			Post thaw	96 well			SPZ				Percent	Average or	Average
	Infection	(days)	Sporozoites	Sporozoites/	Recovery	plate		Spz	HCO4	96well	Total	Total	HCO4	Percent	Percent
Expt	Date		day	mosquito	(%)	HCO4/well	SPZ/well	Fresh/cryo	Incubation	plate	Infected	All	Infectivity	Viability	Viability
136	Control	2	20	21428		80000	40000	FRESH	3 hrs	A09	3496	58874	5.93811
RPMIspz:CS2 ratio	2015-12-08					80000	40000	FRESH	3 hrs	B09	4252	34610	12.2855
Manual						80000	40000	FRESH	3 hrs	C09	5236	39152	13.3735
						80000	40000	FRESH	3 hrs	D09	5180	35458	14.6088	11.5515	Control
RPMIspz:CS2 1:3	2015-12-08					80000	40000	FRESH	3 hrs	E09	3490	31932	10.9295	94.6154
						80000	40000	FRESH	3 hrs	F09	3682	30710	11.9896	103.793
						80000	40000	FRESH	3 hrs	G09	4514	39934	11.3037	97.8546
						80000	40000	FRESH	3 hrs	H09	3822	32596	11.7254	101.505	99.442
RPMIspz:CS2 1:1	2015-12-08					80000	40000	FRESH	3 hrs	A10	4190	41708	10.046	86.9675
						80000	40000	FRESH	3 hrs	B10	2548	17866	14.2617	123.462									Fresh	Cryopreserved
						80000	40000	FRESH	3 hrs	C10	3588	42114	8.51973	73.7545									Sporozoites	Sporozoites
						80000	40000	FRESH	3 hrs	D10	4192	32988	12.7077	110.009	98.5483							Control	8.98688
RPMIspz:CS2 3:1	2015-12-08					80000	40000	FRESH	3 hrs	E10	5810	55942	10.3858	89.9084								1:3	7.4125	3.04125
						80000	40000	FRESH	3 hrs	F10	4374	40084	10.9121	94.4648								1:1	7.57563	3.39875
						80000	40000	FRESH	3 hrs	G10	4476	39106	11.4458	99.0853								3:1	8.975	0.780625
						80000	40000	FRESH	3 hrs	H10	4354	37340	11.6604	100.943	96.1004								SD	SD
RPMIspz:CS2 1:3	2015-12-10				100	80000	40000	Cryo	3 hrs	E02	942	24200	3.89256	33.6975								Control	#DIV/0!
	Thaw at RT					80000	40000	Cryo	3 hrs	F02	1448	19396	7.46546	64.6277								1:3	#DIV/0!	#DIV/0!
						80000	40000	Cryo	3 hrs	G02	1332	36356	3.66377	31.7169								1:1	#DIV/0!	#DIV/0!
						80000	40000	Cryo	3 hrs	H02	1076	25206	4.26882	36.9548	41.7492							3:1	#DIV/0!	#DIV/0!
RPMIspz:CS2 1:1	2015-12-10				100	80000	40000	Cryo	3 hrs	A03	1766	41322	4.27375	36.9974
	Thaw at RT					80000	40000	Cryo	3 hrs	B03	1082	28358	3.8155	33.0304
						80000	40000	Cryo	3 hrs	C03	1614	32144	5.02115	43.4676
						80000	40000	Cryo	3 hrs	D03	1300	32720	3.97311	34.3948	36.9726
RPMIspz:CS2 3:1	2015-12-10				96.29	80000	40000	Cryo	3 hrs	E03	312	45572	0.684631	5.92678
	Thaw at RT					80000	40000	Cryo	3 hrs	F03	168	34006	0.49403	4.27677
						80000	40000	Cryo	3 hrs	G03	294	34856	0.84347	7.30184
						80000	40000	Cryo	3 hrs	H03	292	38662	0.755264	6.53824	6.01091

## Sheet: Fig4B
P. berghei ANKA GFP spz after cryopreservation and infection in HC-04																					Statistical Results:	Hep_infect/fresh (non-normal) and no diff
Raw data																			Analyzed data			Hep_infect/cryo (non-normal) and diff (A=control, B=1:3, 1:1,3:1)
RPMIspz:DX5 ratio	1:3, 1:1, 3:1
Cryopreservation manual
		Storage in				Infection					Flow Reading
	File name	LNVP			Post thaw	96 well			SPZ				Percent	Average or	Average
	Infection	(days)	Sporozoites	Sporozoites/	Recovery	plate		Spz	HCO4	96well	Total	Total	HCO4	Percent	Percent
Expt	Date		day	mosquito	(%)	HCO4/well	SPZ/well	Fresh/cryo	Incubation	plate	Infected	All	Infectivity	Viability	Viability				Figure 4B		Expt 1	Expt 2						Fresh	Cryopreserved
93	Control	7	20	25925		80000	40000	FRESH	3 hrs	E11	4350	40830	10.6539								Average	Average	Average					Sporozoites	Sporozoites
RPMIspz:DX5 ratio	2015-08-11					80000	40000	FRESH	3 hrs	F11	3696	38250	9.66275								Percent	Percent	Percent				Control	10.634
Manual						80000	40000	FRESH	3 hrs	G11	3600	42549	8.46083								Hepatocyte	Hepatocyte	Hepatocyte				1:3	7.65991	0.16341
						80000	40000	FRESH	3 hrs	H11	3636	36612	9.93117	9.67717	Control				DX5(ul)	Ratio	Infectivity	Infectivity	Infectivity	SD			1:1	10.115	0.640255
RPMIspz:DX5, 1:3	2015-08-28				48	80000	40000	Cryo	3 hrs	E10	150	83409	0.179837	1.85836					0	1	9.67717	5.33719	10.634	3.06883			3:1	10.4756	0.772794
	Thaw at RT					80000	40000	Cryo	3 hrs	F10	144	78222	0.184091	1.90233					75	1:3	3.35408	11.9657	7.65991	6.08937				SD	SD
						80000	40000	Cryo	3 hrs	G10	345	102891	0.335306	3.46492					50	1:1	4.32796	15.9021	10.115	8.18417			Control	5.59562
						80000	40000	Cryo	3 hrs	H10	333	84951	0.391991	4.05067	2.81907				25	3:1	4.73398	16.2171	10.4756	8.11982			1:3	4.74616	0.136711
RPMIspz:DX5, 1:1	2015-08-28				45.71	80000	40000	Cryo	3 hrs	A11	333	84261	0.395201	4.08385					75	1:3	0.272806	0.0540146	0.16341	0.154709			1:1	6.34841	0.20654
	Thaw at RT					80000	40000	Cryo	3 hrs	B11	519	53430	0.971364	10.0377					50	1:1	0.600783	0.679728	0.640255	0.0558227			3:1	6.16627	0.102208
						80000	40000	Cryo	3 hrs	C11	378	103647	0.364699	3.76866					25	3:1	0.82223	0.723358	0.772794	0.0699127
						80000	40000	Cryo	3 hrs	D11	504	75015	0.671866	6.94279	6.20825
RPMIspz:DX5, 3:1	2015-08-28				43.43	80000	40000	Cryo	3 hrs	E12	798	98400	0.810976	8.3803
	Thaw at RT					80000	40000	Cryo	3 hrs	F12	798	99216	0.804306	8.31137
						80000	40000	Cryo	3 hrs	G12	798	114372	0.697723	7.20999
						80000	40000	Cryo	3 hrs	H12	705	72240	0.975914	10.0847	8.49659
																												Figure 4B
		Storage in				Infection					Flow Reading																		Sporozoites viability (% control)
	File name	LNVP			Post thaw	96 well			SPZ				Percent	Average or	Average														Average		Average
	Infection	(days)	Sporozoites	Sporozoites/	Recovery	plate		Spz	HCO4	96well	Total	Total	HCO4	Percent	Percent													Ratio	Percent		Percent
Expt	Date		day	mosquito	(%)	HCO4/well	SPZ/well	Fresh/cryo	Incubation	plate	Infected	All	Infectivity	Viability	Viability														Viability		Viability
137	Control	1	20	24264		80000	40000	FRESH	3 hrs	A08	3520	60330	5.83458																Fresh		Cryopreserved
RPMIspz:DX5 ratio	2015-12-14					80000	40000	FRESH	3 hrs	B08	3284	66532	4.93597																Sporozoites	SD	Sporozoites	SD
Manual						80000	40000	FRESH	3 hrs	C08	3042	63000	4.82857															Control	100	0
						80000	40000	FRESH	3 hrs	D08	3522	61256	5.74964	5.33719	Control													1:3	66.8494	5.6652	1.91556	1.27776
RPMIspz:DX5, 1:3	2015-12-14					80000	40000	FRESH	3 hrs	E08	2164	92756	2.333	43.7122														1:1	87.6276	9.24463	9.47197	4.6156
						80000	40000	FRESH	3 hrs	F08	3546	62376	5.68488	106.514														3:1	92.3639	5.18453	11.0249	3.57554
						80000	40000	FRESH	3 hrs	G08	2238	84496	2.64865	49.6262
						80000	40000	FRESH	3 hrs	H08	2684	97608	2.74977	51.521	62.8435
RPMIspz:DX5, 1:1	2015-12-14					80000	40000	FRESH	3 hrs	A09	3484	89582	3.88917	72.8693
						80000	40000	FRESH	3 hrs	B09	3354	77792	4.3115	80.7822
						80000	40000	FRESH	3 hrs	C09	3678	72652	5.06249	94.8531
						80000	40000	FRESH	3 hrs	D09	3878	95784	4.04869	75.8581	81.0907
RPMIspz:DX5, 3:1	2015-12-14					80000	40000	FRESH	3 hrs	E09	3616	82776	4.36842	81.8486
						80000	40000	FRESH	3 hrs	F09	3540	80390	4.40353	82.5066
						80000	40000	FRESH	3 hrs	G09	3988	92434	4.31443	80.8371
						80000	40000	FRESH	3 hrs	H09	3920	67014	5.84952	109.599	88.6979
RPMIspz:DX5, 1:3	2015-12-15				72.73	80000	40000	Cryo	3 hrs	A01	30	44198	0.0678764	1.27176
	Thaw at RT					80000	40000	Cryo	3 hrs	B01	14	36430	0.0384299	0.720039
						80000	40000	Cryo	3 hrs	C01	26	50872	0.0511087	0.957595
						80000	40000	Cryo	3 hrs	D01	18	30694	0.0586434	1.09877	1.01204
RPMIspz:DX5, 1:1	2015-12-15				72.73	80000	40000	Cryo	3 hrs	E01	310	43588	0.711205	13.3255
	Thaw at RT					80000	40000	Cryo	3 hrs	F01	332	40352	0.82276	15.4156
						80000	40000	Cryo	3 hrs	G01	306	46372	0.659881	12.3638
						80000	40000	Cryo	3 hrs	H01	274	52184	0.525065	9.83786	12.7357
RPMIspz:DX5, 3:1	2015-12-15				64.65	80000	40000	Cryo	3 hrs	A02	546	75402	0.724119	13.5674
	Thaw at RT					80000	40000	Cryo	3 hrs	B02	384	60854	0.631019	11.823
						80000	40000	Cryo	3 hrs	C02	494	62178	0.794493	14.886
						80000	40000	Cryo	3 hrs	D02	468	62920	0.743802	13.9362	13.5532
		Storage in				Infection					Flow Reading
	File name	LNVP			Post thaw	96 well			SPZ				Percent	Average or	Average
	Infection	(days)	Sporozoites	Sporozoites/	Recovery	plate		Spz	HCO4	96well	Total	Total	HCO4	Percent	Percent
Expt	Date		day	mosquito	(%)	HCO4/well	SPZ/well	Fresh/cryo	Incubation	plate	Infected	All	Infectivity	Viability	Viability
145	Control	0	20	10937		80000	40000	FRESH	3 hrs	A09	5422	28274	19.1766
RPMIspz:DX5 ratio	2015-12-29					80000	40000	FRESH	3 hrs	B09	4376	19564	22.3676
						80000	40000	FRESH	3 hrs	C09	3484	29740	11.7149
						80000	40000	FRESH	3 hrs	D09	2958	20698	14.2912	16.8876	Control
RPMIspz:DX5, 1:3						80000	40000	FRESH	3 hrs	E09	3096	27166	11.3966	67.4851
						80000	40000	FRESH	3 hrs	F09	3070	24190	12.6912	75.151
						80000	40000	FRESH	3 hrs	G09	3580	28302	12.6493	74.9029
						80000	40000	FRESH	3 hrs	H09	2674	24034	11.1259	65.8822	70.8553
RPMIspz:DX5, 1:1						80000	40000	FRESH	3 hrs	A10	5056	30022	16.841	99.724
						80000	40000	FRESH	3 hrs	B10	4008	23080	17.3657	102.831
						80000	40000	FRESH	3 hrs	C10	4172	32676	12.7678	75.6045
						80000	40000	FRESH	3 hrs	D10	4248	25538	16.634	98.4986	94.1646
RPMIspz:DX5, 3:1						80000	40000	FRESH	3 hrs	E10	5026	29926	16.7948	99.4503
						80000	40000	FRESH	3 hrs	F10	3918	23848	16.4291	97.2848
						80000	40000	FRESH	3 hrs	G10	5324	33226	16.0236	94.8839
						80000	40000	FRESH	3 hrs	H10	3800	24326	15.6211	92.5008	96.0299

## Sheet: Fig4C
P. berghei ANKA GFP spz after cryopreservation and infection in HC-04																					Statistical Results:	Hep_infect/fresh (non-normal) and no diff
Raw data																			Analyzed data			Hep_infect/cryo (non-normal) and diff (A=control, B=1:3, 1:1, C=3:1)
RPMIspz:MC ratio	1:3, 1:1, 3:1
Cryopreservation manual
		Storage in				Infection					Flow Reading
	File name	LNVP			Post thaw	96 well			SPZ				Percent	Average or	Average
	Infection	(days)	Sporozoites	Sporozoites/	Recovery	plate		Spz	HCO4	96well	Total	Total	HCO4	Percent	Percent
Expt	Date		day	mosquito	(%)	HCO4/well	SPZ/well	Fresh/cryo	Incubation	plate	Infected	All	Infectivity	Viability	Viability
95	Control	9	20	18750		80000	40000	FRESH	3 hrs	E12	3576	71808	4.97995						Figure 4C		Expt 1	Expt 2					Fresh	Cryopreserved
RPMIspz:MC ratio	2015-08-17					80000	40000	FRESH	3 hrs	F12	2484	56025	4.43373								Average	Average	Average				Sporozoites	Sporozoites
Manual						80000	40000	FRESH	3 hrs	G12	2505	46254	5.41575								Percent	Percent	Percent			Control	6.89192
						80000	40000	FRESH	3 hrs	H12	2655	57699	4.60147	4.85772	Control						Hepatocyte	Hepatocyte	Hepatocyte			1:3	6.13109	0.594076
RPMIspz:MC, 1:3	2015-08-26				60.95	80000	40000	Cryo	3 hrs	E08	144	28695	0.50183	10.3305					MC(ul)	Ratio	Infectivity	Infectivity	Infectivity	SD		1:1	7.42454	0.801393
	Thaw at RT					80000	40000	Cryo	3 hrs	F08	168	29574	0.568067	11.6941					0	1	4.85772	5.33719	6.89192	0.339034		3:1	7.80427	0.786362
						80000	40000	Cryo	3 hrs	G08	234	32850	0.712329	14.6638					75	1:3	4.6772	7.58498	6.13109	2.05611			SD	SD
						80000	40000	Cryo	3 hrs	H08	102	24522	0.415953	8.56271	11.3128				50	1:1	5.27957	9.56951	7.42454	3.03345		Control	2.72633
RPMIspz:MC, 1:1	2015-08-26				64.76	80000	40000	Cryo	3 hrs	A09	333	37518	0.887574	18.2714					25	3:1	5.14711	10.4614	7.80427	3.75779		1:3	1.75978	0.120491
	Thaw at RT					80000	40000	Cryo	3 hrs	B09	321	31971	1.00403	20.6688					75	1:3	0.549544	0.638607	0.594076	0.0629767		1:1	2.51031	0.178581
						80000	40000	Cryo	3 hrs	C09	381	47814	0.796838	16.4035					50	1:1	0.884	0.718786	0.801393	0.116824		3:1	3.26598	0.138273
						80000	40000	Cryo	3 hrs	D09	228	26901	0.847552	17.4475	18.1978				25	3:1	0.71553	0.857194	0.786362	0.100172
RPMIspz:MC, 3:1	2015-08-26				57.14	80000	40000	Cryo	3 hrs	E09	396	51099	0.774966	15.9533
	Thaw at RT					80000	40000	Cryo	3 hrs	F09	297	32448	0.915311	18.8424
						80000	40000	Cryo	3 hrs	G09	282	43266	0.651782	13.4174
						80000	40000	Cryo	3 hrs	H09	252	48456	0.520059	10.7058	14.7297
																												Figure 4C
		Storage in				Infection					Flow Reading																		Sporozoites viability (% control)
	File name	LNVP			Post thaw	96 well			SPZ				Percent	Average or	Average														Average		Average
	Infection	(days)	Sporozoites	Sporozoites/	Recovery	plate		Spz	HCO4	96well	Total	Total	HCO4	Percent	Percent													Ratio	Percent		Percent
Expt	Date		day	mosquito	(%)	HCO4/well	SPZ/well	Fresh/cryo	Incubation	plate	Infected	All	Infectivity	Viability	Viability														Viability		Viability
137	Control	1	20	24264		80000	40000	FRESH	3 hrs	A08	3520	60330	5.83458																Fresh		Cryopreserved
RPMIspz:MC ratio	2015-12-14					80000	40000	FRESH	3 hrs	B08	3284	66532	4.93597																Sporozoites	SD	Sporozoites	SD
Manual						80000	40000	FRESH	3 hrs	C08	3042	63000	4.82857															Control	100	0
						80000	40000	FRESH	3 hrs	D08	3522	61256	5.74964	5.33719	Control													1:3	80.0021	10.7934	11.639	0.461339
RPMIspz:MC, 1:3	2015-12-14					80000	40000	FRESH	3 hrs	A10	3668	76712	4.78152	89.5887														1:1	95.1127	5.385	15.8327	3.34484
						80000	40000	FRESH	3 hrs	B10	3590	63394	5.663	106.104														3:1	98.1268	2.38742	15.3953	0.941189
						80000	40000	FRESH	3 hrs	C10	3876	74686	5.18973	97.2371
						80000	40000	FRESH	3 hrs	D10	2198	71490	3.07456	57.6063	87.6341
RPMIspz:MC, 1:1	2015-12-14					80000	40000	FRESH	3 hrs	E10	3768	56390	6.68204	125.198
						80000	40000	FRESH	3 hrs	F10	2324	72428	3.2087	60.1197
						80000	40000	FRESH	3 hrs	G10	2868	48888	5.86647	109.917
						80000	40000	FRESH	3 hrs	H10	2432	45364	5.36108	100.448	98.9205
RPMIspz:MC, 3:1	2015-12-14					80000	40000	FRESH	3 hrs	A11	3284	45832	7.1653	134.252
						80000	40000	FRESH	3 hrs	B11	2506	43928	5.70479	106.888
						80000	40000	FRESH	3 hrs	C11	2738	56732	4.8262	90.4259
						80000	40000	FRESH	3 hrs	D11	2516	86994	2.89215	54.1887	96.4386
RPMIspz:MC, 1:3	2015-12-15		RT		90.51	80000	40000	Cryo	3 hrs	E11	330	55938	0.589939	11.0534
	Thaw at RT					80000	40000	Cryo	3 hrs	F11	302	41122	0.7344	13.7601
						80000	40000	Cryo	3 hrs	G11	462	63342	0.729374	13.6659
						80000	40000	Cryo	3 hrs	H11	350	69900	0.500715	9.38163	11.9652
RPMIspz:MC, 1:1	2015-12-15		RT		80.81	80000	40000	Cryo	3 hrs	A12	326	75016	0.434574	8.14237
	Thaw at RT					80000	40000	Cryo	3 hrs	B12	484	52070	0.929518	17.4159
						80000	40000	Cryo	3 hrs	C12	436	65840	0.662211	12.4075
						80000	40000	Cryo	3 hrs	D12	458	53956	0.84884	15.9042	13.4675
RPMIspz:MC, 3:1	2015-12-15		RT		76.77	80000	40000	Cryo	3 hrs	E12	662	80752	0.819794	15.36
	Thaw at RT					80000	40000	Cryo	3 hrs	F12	624	66892	0.932847	17.4782
						80000	40000	Cryo	3 hrs	G12	632	76136	0.830094	15.553
						80000	40000	Cryo	3 hrs	H12	658	77774	0.846041	15.8518	16.0608
		Storage in				Infection					Flow Reading
	File name	LNVP			Post thaw	96 well			SPZ				Percent	Average or	Average
	Infection	(days)	Sporozoites	Sporozoites/	Recovery	plate		Spz	HCO4	96well	Total	Total	HCO4	Percent	Percent
Expt	Date		day	mosquito	(%)	HCO4/well	SPZ/well	Fresh/cryo	Incubation	plate	Infected	All	Infectivity	Viability	Viability
146	Control	0	19	6666		80000	40000	FRESH	3 hrs	A01	3664	36850	9.94301
RPMIspz:MC ratio	2015-12-30					80000	40000	FRESH	3 hrs	B01	3162	32248	9.80526
						80000	40000	FRESH	3 hrs	C01	3716	31388	11.8389
						80000	40000	FRESH	3 hrs	D01	2952	28560	10.3361	10.4808	Control
RPMIspz:MC, 1:3	2015-12-30					80000	40000	FRESH	3 hrs	E01	2458	33710	7.2916	69.5709
						80000	40000	FRESH	3 hrs	F01	1476	21082	7.00123	66.8004
						80000	40000	FRESH	3 hrs	G01	2372	28612	8.29023	79.099
						80000	40000	FRESH	3 hrs	H01	2330	30038	7.75684	74.0098	72.37
RPMIspz:MC, 1:1	2015-12-30					80000	40000	FRESH	3 hrs	A02	3634	40742	8.91954	85.1034
						80000	40000	FRESH	3 hrs	B02	2684	27464	9.77279	93.2444
						80000	40000	FRESH	3 hrs	C02	3418	35852	9.53364	90.9626
						80000	40000	FRESH	3 hrs	D02	3088	30720	10.0521	95.9092	91.3049
RPMIspz:MC, 3:1	2015-12-30					80000	40000	FRESH	3 hrs	E02	4234	47014	9.00583	85.9267
						80000	40000	FRESH	3 hrs	F02	2536	25938	9.77716	93.2861
						80000	40000	FRESH	3 hrs	G02	3660	36006	10.165	96.9863
						80000	40000	FRESH	3 hrs	H02	4118	31928	12.8978	123.061	99.8149

## Sheet: Fig4D
P. berghei ANKA GFP spz after cryopreservation and infection in HC-04																					Statistical Results:	Hep_infect/fresh (non-normal) and no diff
Raw data																			Analyzed data			Hep_infect/cryo (non-normal) and diff (A=control, B=1:3, 1:1,3:1)
RPMIspz:HESTAR200 ratio	1:3, 1:1, 3:1
Cryopreservation manual
		Storage in				Infection					Flow Reading
	File name	LNVP			Post thaw	96 well			SPZ				Percent	Average or	Average
	Infection	(days)	Sporozoites	Sporozoites/	Recovery	plate		Spz	HCO4	96well	Total	Total	HCO4	Percent	Percent
Expt	Date		day	mosquito	(%)	HCO4/well	SPZ/well	Fresh/cryo	Incubation	plate	Infected	All	Infectivity	Viability	Viability
83	Control	1	23	13888		80000	40000	FRESH	3 hrs	E05	2910	46548	6.25161						Figure 4D		Expt 1	Expt 2					Fresh	Cryopreserved
RPMIspz:HESTAR ratio	2015-07-17					80000	40000	FRESH	3 hrs	F05	2367	37437	6.32262								Average	Average	Average				Sporozoites	Sporozoites
Manual						80000	40000	FRESH	3 hrs	G05	2178	53481	4.07247								Percent	Percent	Percent			Control	8.17985
						80000	40000	FRESH	3 hrs	H05	2649	40092	6.6073	5.8135	Control						Hepatocyte	Hepatocyte	Hepatocyte			1:3	9.03217	0.12207
RPMIspz:HES 1:3	2015-07-18				44.44	80000	40000	Cryo	3 hrs	A06	189	82563	0.228916	3.93766					HESTAR(ul)	Ratio	Infectivity	Infectivity	Infectivity	SD		1:1	9.47454	0.0692555
	Thaw at RT					80000	40000	Cryo	3 hrs	B06	150	101034	0.148465	2.55379					0	1	5.8135	12.4276	8.17985	4.67691		3:1	8.29896	0.0697019
						80000	40000	Cryo	3 hrs	C06	183	78297	0.233725	4.02039					75	1:3	12.2581	5.8062	9.03217	4.56221			SD	SD
						80000	40000	Cryo	3 hrs	D06	159	72150	0.220374	3.79073	3.57564				50	1:1	12.8237	6.12539	9.47454	4.73641		Control	3.44037
RPMIspz:HES 1:1	2015-07-18				86.67	80000	40000	Cryo	3 hrs	E06	54	70440	0.076661	1.31867					25	3:1	10.2662	6.33169	8.29896	2.78215		1:3	3.56981	0.0954328
	Thaw at RT					80000	40000	Cryo	3 hrs	F06	78	79059	0.0986605	1.69709					75	1:3	0.20787	0.101046	0.12207	0.0755363		1:1	3.66003	0.0392298
						80000	40000	Cryo	3 hrs	G06	81	58611	0.138199	2.37721					50	1:1	0.10224	0.0362708	0.0692555	0.0466475		3:1	3.66003	0.0267128
						80000	40000	Cryo	3 hrs	H06	66	69153	0.0954405	1.6417	1.75867				25	3:1	0.0942251	0.0451787	0.0697019	0.034681
RPMIspz:HES 3:1	2015-07-18				84.44	80000	40000	Cryo	3 hrs	A07	75	80667	0.0929748	1.59929
	Thaw at RT					80000	40000	Cryo	3 hrs	B07	60	61143	0.0981306	1.68798
						80000	40000	Cryo	3 hrs	C07	60	70917	0.0846059	1.45534
						80000	40000	Cryo	3 hrs	D07	84	83013	0.101189	1.74059	1.6208
																													Figure 4D
		Storage in				Infection					Flow Reading																		Sporozoites viability (% control)
	File name	LNVP			Post thaw	96 well			SPZ				Percent	Average or	Average														Average		Average
	Infection	(days)	Sporozoites	Sporozoites/	Recovery	plate		Spz	HCO4	96well	Total	Total	HCO4	Percent	Percent														Percent		Percent
Expt	Date		day	mosquito	(%)	HCO4/well	SPZ/well	Fresh/cryo	Incubation	plate	Infected	All	Infectivity	Viability	Viability														Viability		Viability
134	Control	0	20	20740		80000	40000	FRESH	3 hrs	A01	2808	26396	10.638																Fresh		Cryopreserved
RPMIspz:HESTAR ratio	2015-12-03					80000	40000	FRESH	3 hrs	B01	2432	20896	11.6386																Sporozoites	SD	Sporozoites	SD
						80000	40000	FRESH	3 hrs	C01	3072	25094	12.242															Control	100	0
						80000	40000	FRESH	3 hrs	D01	3338	21972	15.1921	12.4276	Control													1:3	95.4107	4.56119	2.58998	1.39394
RPMIspz:HES 1:3	2015-12-03					80000	40000	FRESH	3 hrs	E01	2730	22838	11.9538	96.1868														1:1	100.22	4.19553	1.16727	0.836363
						80000	40000	FRESH	3 hrs	F01	3504	26780	13.0844	105.285														3:1	91.5684	12.6718	1.16905	0.638865
						80000	40000	FRESH	3 hrs	G01	3130	29894	10.4703	84.2503
						80000	40000	FRESH	3 hrs	H01	3678	27196	13.524	108.822	98.636
RPMIspz:HES 1:1	2015-12-03					80000	40000	FRESH	3 hrs	A02	2672	23042	11.5962	93.3098
						80000	40000	FRESH	3 hrs	B02	3774	28426	13.2766	106.831
						80000	40000	FRESH	3 hrs	C02	3274	26380	12.4109	99.8654
						80000	40000	FRESH	3 hrs	D02	3658	26108	14.011	112.741	103.187
RPMIspz:HES 3:1	2015-12-03					80000	40000	FRESH	3 hrs	E02	3044	30440	10	80.4657
						80000	40000	FRESH	3 hrs	F02	3026	20580	14.7036	118.314
						80000	40000	FRESH	3 hrs	G02	3404	39722	8.56956	68.9556
						80000	40000	FRESH	3 hrs	H02	3012	38656	7.7918	62.6973	82.6081
		Storage in				Infection					Flow Reading
	File name	LNVP			Post thaw	96 well			SPZ				Percent	Average or	Average
	Infection	(days)	Sporozoites	Sporozoites/	Recovery	plate		Spz	HCO4	96well	Total	Total	HCO4	Percent	Percent
Expt	Date		day	mosquito	(%)	HCO4/well	SPZ/well	Fresh/cryo	Incubation	plate	Infected	All	Infectivity	Viability	Viability
140	Control	1	20	14285		80000	40000	FRESH	3 hrs	A09	3378	53726	6.28746
RPMIspz:HESTAR ratio	2015-12-18					80000	40000	FRESH	3 hrs	B09	3178	38494	8.25583
Manual						80000	40000	FRESH	3 hrs	C09	3764	67532	5.57365
						80000	40000	FRESH	3 hrs	D09	3088	60828	5.07661	6.29839	Control
RPMIspz:HES 1:3	2015-12-18					80000	40000	FRESH	3 hrs	E09	3066	53642	5.71567	90.7481
						80000	40000	FRESH	3 hrs	F09	2854	45110	6.32676	100.45
						80000	40000	FRESH	3 hrs	G09	3140	56622	5.54555	88.0471
						80000	40000	FRESH	3 hrs	H09	3368	59750	5.63682	89.4962	92.1855
RPMIspz:HES 1:1	2015-12-18					80000	40000	FRESH	3 hrs	A10	3880	60794	6.38221	101.331
						80000	40000	FRESH	3 hrs	B10	3958	59270	6.67791	106.026
						80000	40000	FRESH	3 hrs	C10	3856	69240	5.56904	88.42
						80000	40000	FRESH	3 hrs	D10	3894	66310	5.87242	93.2368	97.2534
RPMIspz:HES 3:1	2015-12-18					80000	40000	FRESH	3 hrs	E10	3824	70130	5.45273	86.5734
						80000	40000	FRESH	3 hrs	F10	3930	59534	6.60127	104.809
						80000	40000	FRESH	3 hrs	G10	3884	58512	6.63795	105.391
						80000	40000	FRESH	3 hrs	H10	3748	56490	6.6348	105.341	100.529
RPMIspz:HES 1:3	2015-12-19				95.24	80000	40000	Cryo	3 hrs	A03	66	64248	0.102727	1.631
	Thaw at RT					80000	40000	Cryo	3 hrs	B03	68	53698	0.126634	2.01058
						80000	40000	Cryo	3 hrs	C03	54	71156	0.0758896	1.2049
						80000	40000	Cryo	3 hrs	D03	68	68734	0.0989321	1.57075	1.60431
RPMIspz:HES 1:1	2015-12-19				89.29	80000	40000	Cryo	3 hrs	E03	32	75516	0.0423751	0.672793
	Thaw at RT					80000	40000	Cryo	3 hrs	F03	24	66058	0.0363317	0.576841
						80000	40000	Cryo	3 hrs	G03	24	76358	0.0314309	0.499031
						80000	40000	Cryo	3 hrs	H03	26	74402	0.0349453	0.554829	0.575874
RPMIspz:HES 3:1	2015-12-19				83.33	80000	40000	Cryo	3 hrs	A04	32	64544	0.0495786	0.787163
	Thaw at RT					80000	40000	Cryo	3 hrs	B04	30	68594	0.0437356	0.694394
						80000	40000	Cryo	3 hrs	C04	38	86216	0.0440753	0.699788
						80000	40000	Cryo	3 hrs	D04	32	73860	0.0433252	0.687878	0.717305

## Sheet: Fig4E
P. berghei ANKA GFP spz after cryopreservation and infection in HC-04																					Statistical Results:	Hep_infect/fresh (non-normal) and diff (A=control, B= B=1:3, 1:1,3:1)
Raw data																			Analyzed data			Hep_infect/cryo (non-normal) and diff (A=control, B=1:3, 1:1,3:1)
RPMIspz:Voluven ratio	1:3, 1:1, 3:1
Cryopreservation manual
		Storage in				Infection					Flow Reading								Figure 4E		Expt 1	Expt 2					Fresh	Cryopreserved
	File name	LNVP			Post thaw	96 well			SPZ				Percent	Average or	Average						Average	Average	Average				Sporozoites	Sporozoites
	Infection	(days)	Sporozoites	Sporozoites/	Recovery	plate		Spz	HCO4	96well	Total	Total	HCO4	Percent	Percent						Percent	Percent	Percent			Control	9.8747
Expt	Date		day	mosquito	(%)	HCO4/well	SPZ/well	Fresh/cryo	Incubation	plate	Infected	All	Infectivity	Viability	Viability						Hepatocyte	Hepatocyte	Hepatocyte			1:3	7.00642	0.159305
132	Control	1	21	37500		80000	40000	FRESH	3 hrs	A09	4894	46482	10.5288						Voluven(ul)	Ratio	Infectivity	Infectivity	Infectivity	SD		1:1	6.28213	0.122186
RPMIspz:Voluven ratio	2015-11-30					80000	40000	FRESH	3 hrs	B09	3468	35184	9.85675						0	1	10.3863	9.36306	9.8747	0.723569		3:1	6.88174	0.158104
Manual						80000	40000	FRESH	3 hrs	C09	4314	45446	9.49258						75	1:3	7.72197	6.29088	7.00642	1.01193			SD	SD
						80000	40000	FRESH	3 hrs	D09	2168	18582	11.6672	10.3863	Control				50	1:1	6.46947	6.09479	6.28213	0.264937		Control	1.25134
RPMIspz:Vol, 1:3	2015-11-30					80000	40000	FRESH	3 hrs	E09	3518	44012	7.99327	76.9595					25	3:1	7.19945	6.56403	6.88174	0.449307		1:3	0.791909	0.052318
						80000	40000	FRESH	3 hrs	F09	1984	26916	7.37108	70.969					75	1:3	0.157009	0.161602	0.159305	0.00324759		1:1	0.931141	0.030563
						80000	40000	FRESH	3 hrs	G09	3642	47634	7.6458	73.614					50	1:1	0.128664	0.115708	0.122186	0.00916132		3:1	0.969232	0.0478752
						80000	40000	FRESH	3 hrs	H09	2314	29374	7.87771	75.8469	74.3474				25	3:1	0.171603	0.144605	0.158104	0.0190909
RPMIspz:Vol, 1:1	2015-11-30					80000	40000	FRESH	3 hrs	A10	3490	46610	7.48766	72.0915
						80000	40000	FRESH	3 hrs	B10	2204	30788	7.15863	68.9236
						80000	40000	FRESH	3 hrs	C10	2610	56412	4.62668	44.5458
						80000	40000	FRESH	3 hrs	D10	2538	38426	6.6049	63.5922	62.2883
RPMIspz:Vol, 3:1	2015-11-30					80000	40000	FRESH	3 hrs	E10	3472	48862	7.10573	68.4142
						80000	40000	FRESH	3 hrs	F10	2850	31696	8.99167	86.5721
						80000	40000	FRESH	3 hrs	G10	3346	57430	5.82622	56.0951
						80000	40000	FRESH	3 hrs	H10	3008	43758	6.87417	66.1848	69.3165
RPMIspz:Vol, 1:3	2015-12-01				89.29	80000	40000	Cryo	3 hrs	E02	28	51648	0.0542131	0.521966
	Thaw at RT					80000	40000	Cryo	3 hrs	F02	44	24158	0.182134	1.75359
						80000	40000	Cryo	3 hrs	G02	88	47774	0.184201	1.77349
						80000	40000	Cryo	3 hrs	H02	94	45304	0.207487	1.99769	1.51169
RPMIspz:Vol, 1:1	2015-12-01				71.43	80000	40000	Cryo	3 hrs	A03	82	57202	0.143352	1.38019
	Thaw at RT					80000	40000	Cryo	3 hrs	B03	60	43374	0.138332	1.33186
						80000	40000	Cryo	3 hrs	C03	58	47254	0.122741	1.18175
						80000	40000	Cryo	3 hrs	D03	46	41730	0.110232	1.06132	1.23878
RPMIspz:Vol, 3:1	2015-12-01				71.43	80000	40000	Cryo	3 hrs	E03	54	43142	0.125168	1.20512
	Thaw at RT					80000	40000	Cryo	3 hrs	F03	102	38312	0.266235	2.56332
						80000	40000	Cryo	3 hrs	G03	88	54466	0.161569	1.55559
						80000	40000	Cryo	3 hrs	H03	66	49460	0.133441	1.28478	1.6522
																			Set 2				Expt 1	Expt 2				Figure 4E
		Storage in				Infection					Flow Reading												Average	Average	Average				Sporozoites viability (% control)
	File name	LNVP			Post thaw	96 well			SPZ				Percent	Average or	Average								Percent	Percent	Percent				Average		Average
	Infection	(days)	Sporozoites	Sporozoites/	Recovery	plate		Spz	HCO4	96well	Total	Total	HCO4	Percent	Percent								Sporozites	Sporozites	Sporozites				Percent		Percent
Expt	Date		day	mosquito	(%)	HCO4/well	SPZ/well	Fresh/cryo	Incubation	plate	Infected	All	Infectivity	Viability	Viability					RPMIspz(ul)	Voluven(ul)	Ratio	Infectivity	Infectivity	Infectivity	SD			Viability		Viability
138	Control	1	19	20212		80000	40000	FRESH	3 hrs	A03	4250	42994	9.8851						Control	100	0	1	9.2775	8.4275	8.8525	0.601041			Fresh		Cryopreserved
RPMIspz:Voluven ratio	2015-12-16					80000	40000	FRESH	3 hrs	B03	2634	23798	11.0682						Fresh	25	75	1:3	7.16125	7.87875	7.52	0.507349			Sporozoites	SD	Sporozoites	SD
Manual						80000	40000	FRESH	3 hrs	C03	3588	41088	8.73248							50	50	1:1	6.77625	7.24125	7.00875	0.328805		Control	100	0
						80000	40000	FRESH	3 hrs	D03	3012	38782	7.76649	9.36306	Control					75	25	3:1	7.9225	7.9875	7.955	0.0459619		1:3	70.7678	5.06223	1.61882	0.151507
RPMIspz:Vol, 1:3	2015-12-16					80000	40000	FRESH	3 hrs	E03	3854	61396	6.27728	67.0431					Voluven	25	75	1:3	0.15875	0.2025	0.180625	0.0309359		1:1	63.6911	1.98398	1.23729	0.00211332
						80000	40000	FRESH	3 hrs	F03	2496	39336	6.34533	67.7699						50	50	1:1	0.15375	0.14375	0.14875	0.00707107		3:1	69.7111	0.558007	1.59831	0.0762149
						80000	40000	FRESH	3 hrs	G03	3526	54684	6.44796	68.8659						75	25	3:1	0.19375	0.175	0.184375	0.0132583
						80000	40000	FRESH	3 hrs	H03	2730	44806	6.09293	65.0742	67.1883
RPMIspz:Vol, 1:1	2015-12-16					80000	40000	FRESH	3 hrs	A04	3376	49526	6.81662	72.8034
						80000	40000	FRESH	3 hrs	B04	2298	41632	5.51979	58.9529
						80000	40000	FRESH	3 hrs	C04	3080	51106	6.02669	64.3667
						80000	40000	FRESH	3 hrs	D04	2832	47074	6.01606	64.2532	65.094
RPMIspz:Vol, 3:1	2015-12-16					80000	40000	FRESH	3 hrs	E04	3790	57206	6.62518	70.7587
						80000	40000	FRESH	3 hrs	F04	2430	40524	5.99645	64.0437
						80000	40000	FRESH	3 hrs	G04	3352	47594	7.0429	75.2201
						80000	40000	FRESH	3 hrs	H04	3208	48668	6.5916	70.4001	70.1057
RPMIspz:Vol, 1:3	2015-12-17				84.21	80000	40000	Cryo	3 hrs	A07	86	75974	0.113197	1.20897
Read file 12/17/15	Thaw at RT					80000	40000	Cryo	3 hrs	B07	86	48204	0.178408	1.90545
						80000	40000	Cryo	3 hrs	C07	108	52720	0.204856	2.18792
						80000	40000	Cryo	3 hrs	D07	44	29344	0.149945	1.60146	1.72595
RPMIspz:Vol, 1:1	2015-12-17				70.18	80000	40000	Cryo	3 hrs	E07	44	50768	0.0866688	0.925646
	Thaw at RT					80000	40000	Cryo	3 hrs	F07	44	42606	0.103272	1.10297
						80000	40000	Cryo	3 hrs	G07	106	59142	0.17923	1.91422
						80000	40000	Cryo	3 hrs	H07	36	38436	0.0936622	1.00034	1.23579
RPMIspz:Vol, 3:1	2015-12-17				70.18	80000	40000	Cryo	3 hrs	A08	70	59490	0.117667	1.25671
	Thaw at RT					80000	40000	Cryo	3 hrs	B08	42	29104	0.14431	1.54127
						80000	40000	Cryo	3 hrs	C08	90	50424	0.178486	1.90628
						80000	40000	Cryo	3 hrs	D08	78	56540	0.137955	1.4734	1.54442

## Sheet: Fig4F
P. berghei ANKA GFP spz after cryopreservation and infection in HC-04																					Statistical Results:	Hep_infect/fresh (non-normal) and no diff
Raw data																			Analyzed data			Hep_infect/cryo (non-normal) and diff (A=control, B=1:3, 1:1,3:1)
RPMIspz:Hetastarch ratio	1:3, 1:1, 3:1
Cryopreservation manual
		Storage in				Infection					Flow Reading
	File name	LNVP			Post thaw	96 well			SPZ				Percent	Average or	Average				Figure 4F		Expt 1	Expt 2					Fresh	Cryopreserved
	Infection	(days)	Sporozoites	Sporozoites/	Recovery	plate		Spz	HCO4	96well	Total	Total	HCO4	Percent	Percent						Average	Average	Average				Sporozoites	Sporozoites
Expt	Date		day	mosquito	(%)	HCO4/well	SPZ/well	Fresh/cryo	Incubation	plate	Infected	All	Infectivity	Viability	Viability						Percent	Percent	Percent			Control	8.73963
131	Control	1	21	37500		80000	40000	FRESH	3 hrs	A07	4672	39162	11.9299								Hepatocyte	Hepatocyte	Hepatocyte			1:3	6.11758	0.156918
RPMIspz:Hetastarch ratio	2015-11-30					80000	40000	FRESH	3 hrs	B07	3282	25676	12.7824						Hetastach(ul)	Ratio	Infectivity	Infectivity	Infectivity	SD		1:1	6.13198	0.0969457
Manual						80000	40000	FRESH	3 hrs	C07	4884	43414	11.2498						0	1	11.9424	5.53689	8.73963	4.52936		3:1	5.83659	0.0953024
						80000	40000	FRESH	3 hrs	D07	2898	24544	11.8074	11.9424	Control				75	1:3	8.39558	3.83957	6.11758	3.22158			SD	SD
RPMIspz:Heta 1:3	2015-11-30					80000	40000	FRESH	3 hrs	E07	3224	35974	8.96203	75.0439					50	1:1	7.52259	4.74138	6.13198	1.96661		Control	3.47544
						80000	40000	FRESH	3 hrs	F07	2106	23638	8.90938	74.6031					25	3:1	7.53525	4.13794	5.83659	2.40226		1:3	2.47766	0.0682362
						80000	40000	FRESH	3 hrs	G07	3440	42020	8.18658	68.5507					75	1:3	0.19358	0.120255	0.156918	0.0518488		1:1	1.58137	0.0407512
						80000	40000	FRESH	3 hrs	H07	2474	32880	7.52433	63.0053	70.3008				50	1:1	0.0976455	0.096246	0.0969457	0.000989558		3:1	1.85347	0.0455062
RPMIspz:Heta 1:1	2015-11-30					80000	40000	FRESH	3 hrs	A08	2918	34370	8.48996	71.0911					25	3:1	0.131906	0.0586992	0.0953024	0.0517648
						80000	40000	FRESH	3 hrs	B08	2618	35202	7.43708	62.2747
						80000	40000	FRESH	3 hrs	C08	3576	48170	7.42371	62.1628
						80000	40000	FRESH	3 hrs	D08	2304	34186	6.7396	56.4344	62.9907
RPMIspz:Heta 3:1	2015-11-30					80000	40000	FRESH	3 hrs	E08	2572	32000	8.0375	67.3024
						80000	40000	FRESH	3 hrs	F08	2094	29248	7.15946	59.9501
						80000	40000	FRESH	3 hrs	G08	3126	39452	7.92355	66.3482
						80000	40000	FRESH	3 hrs	H08	1680	23930	7.02048	58.7863	63.0967
RPMIspz:Heta 1:3	2015-12-01				95.23	80000	40000	Cryo	3 hrs	A01	92	37060	0.248246	2.0787
	Thaw at RT					80000	40000	Cryo	3 hrs	B01	48	26456	0.181433	1.51924
						80000	40000	Cryo	3 hrs	C01	60	36798	0.163052	1.36533
						80000	40000	Cryo	3 hrs	D01	72	39650	0.181589	1.52054	1.62095
RPMIspz:Heta 1:1	2015-12-01				83.33	80000	40000	Cryo	3 hrs	E01	56	43426	0.128955	1.07981
	Thaw at RT					80000	40000	Cryo	3 hrs	F01	20	30892	0.0647417	0.542117
						80000	40000	Cryo	3 hrs	G01	62	42048	0.147451	1.23468
						80000	40000	Cryo	3 hrs	H01	16	32366	0.0494346	0.413943	0.817639
RPMIspz:Heta 3:1	2015-12-01				77.38	80000	40000	Cryo	3 hrs	A02	76	54454	0.139567	1.16867
	Thaw at RT					80000	40000	Cryo	3 hrs	B02	50	39572	0.126352	1.05801
						80000	40000	Cryo	3 hrs	C02	82	47834	0.171426	1.43544
						80000	40000	Cryo	3 hrs	D02	40	44308	0.0902772	0.75594	1.10452
																												Figure 4F
		Storage in				Infection					Flow Reading																		Sporozoites viability (% control)
	File name	LNVP			Post thaw	96 well			SPZ				Percent	Average or	Average														Average		Average
	Infection	(days)	Sporozoites	Sporozoites/	Recovery	plate		Spz	HCO4	96well	Total	Total	HCO4	Percent	Percent														Percent		Percent
Expt	Date		day	mosquito	(%)	HCO4/well	SPZ/well	Fresh/cryo	Incubation	plate	Infected	All	Infectivity	Viability	Viability														Viability		Viability
139	Control	2	19	19148		80000	40000	FRESH	3 hrs	A05	2626	44790	5.86292																Fresh		Cryopreserved
RPMIspz:Hetastarch ratio	2015-12-17					80000	40000	FRESH	3 hrs	B05	1672	26940	6.20638																Sporozoites	SD	Sporozoites	SD
Manual						80000	40000	FRESH	3 hrs	C05	1892	35146	5.38326															Control	100	0
						80000	40000	FRESH	3 hrs	D05	1624	34590	4.695	5.53689	Control													1:3	69.823	0.675637	1.89642	0.389569
RPMIspz:Heta 1:3	2015-12-16					80000	40000	FRESH	3 hrs	E05	1670	42894	3.89332	70.316														1:1	74.3117	16.0102	1.27795	0.650984
						80000	40000	FRESH	3 hrs	F05	964	23918	4.03044	72.7924														3:1	68.9154	8.22879	1.08233	0.0313744
						80000	40000	FRESH	3 hrs	G05	1604	43004	3.72989	67.3643
						80000	40000	FRESH	3 hrs	H05	1168	31528	3.70464	66.9084	69.3453
RPMIspz:Heta 1:1	2015-12-16					80000	40000	FRESH	3 hrs	A06	1432	30282	4.72888	85.4068
						80000	40000	FRESH	3 hrs	B06	1426	29120	4.89698	88.4428
						80000	40000	FRESH	3 hrs	C06	1610	31348	5.13589	92.7577
						80000	40000	FRESH	3 hrs	D06	1350	32114	4.20377	75.923	85.6326
RPMIspz:Heta 3:1	2015-12-16					80000	40000	FRESH	3 hrs	E06	1824	41746	4.36928	78.9122
						80000	40000	FRESH	3 hrs	F06	1206	29146	4.13779	74.7313
						80000	40000	FRESH	3 hrs	G06	1560	40738	3.82935	69.1606
						80000	40000	FRESH	3 hrs	H06	996	23628	4.21534	76.1319	74.734
RPMIspz:Heta 1:3	2015-12-18				85.93	80000	40000	Cryo	3 hrs	A11	106	67964	0.155965	2.81683
	Thaw at RT					80000	40000	Cryo	3 hrs	A12	38	72680	0.052284	0.944284
						80000	40000	Cryo	3 hrs	B11	92	43548	0.211261	3.81552
						80000	40000	Cryo	3 hrs	B12	42	68282	0.0615096	1.11091	2.17189
RPMIspz:Heta 1:1	2015-12-18				81.48	80000	40000	Cryo	3 hrs	C11	64	47462	0.134845	2.43539
	Thaw at RT					80000	40000	Cryo	3 hrs	C12	46	61344	0.074987	1.35432
						80000	40000	Cryo	3 hrs	D11	66	53204	0.124051	2.24044
						80000	40000	Cryo	3 hrs	D12	36	70448	0.0511015	0.922928	1.73827
RPMIspz:Heta 3:1	2015-12-18				74.07	80000	40000	Cryo	3 hrs	E11	40	59060	0.0677277	1.22321
	Thaw at RT					80000	40000	Cryo	3 hrs	F11	24	56880	0.0421941	0.762054
						80000	40000	Cryo	3 hrs	G11	44	67910	0.0647916	1.17018
						80000	40000	Cryo	3 hrs	H11	34	56588	0.0600834	1.08515	1.06015

[truncated: 3 more sheets: Fig4G, Fig 5_Table 3, Table 4]
